# Supplementary material for: In situ real-time and quantitative investigation on the stability of non-aqueous lithium oxygen battery electrolytes
Source: Royal Society of Chemistry journal article supplement (doi:10.1039/c6ta00371k), 2016-01-01
Supplement: c6ta00371k1.pdf [file c6ta00371k1.pdf]

## Supporting Information

### **In-situ Real-time and Quantitative Investigation on Stability of Non-aqueous Lithium Oxygen Battery Electrolytes**

Dong Wook Kim,<sup>a,\*</sup> Su Mi Ahn,<sup>a,b</sup> Jungwon Kang,<sup>a</sup> Jungdon Suk,<sup>a</sup> Hwan Kyu Kim,<sup>b</sup> and Yongku Kang<sup>a,\*</sup>

<sup>a</sup> Advanced Materials Division, Korea Research Institute of Chemical Technology, Yuseong, Daejeon  
305-600, Korea

<sup>b</sup> Global GET-Future Laboratory & Department of Advanced Materials Chemistry, Korea University,  
2511 Sejong-ro, Jochiwon, Sejong 339-700, Korea

(\*Correspondence to: dongwook@kriect.re.kr , ykang@kriect.re.kr)

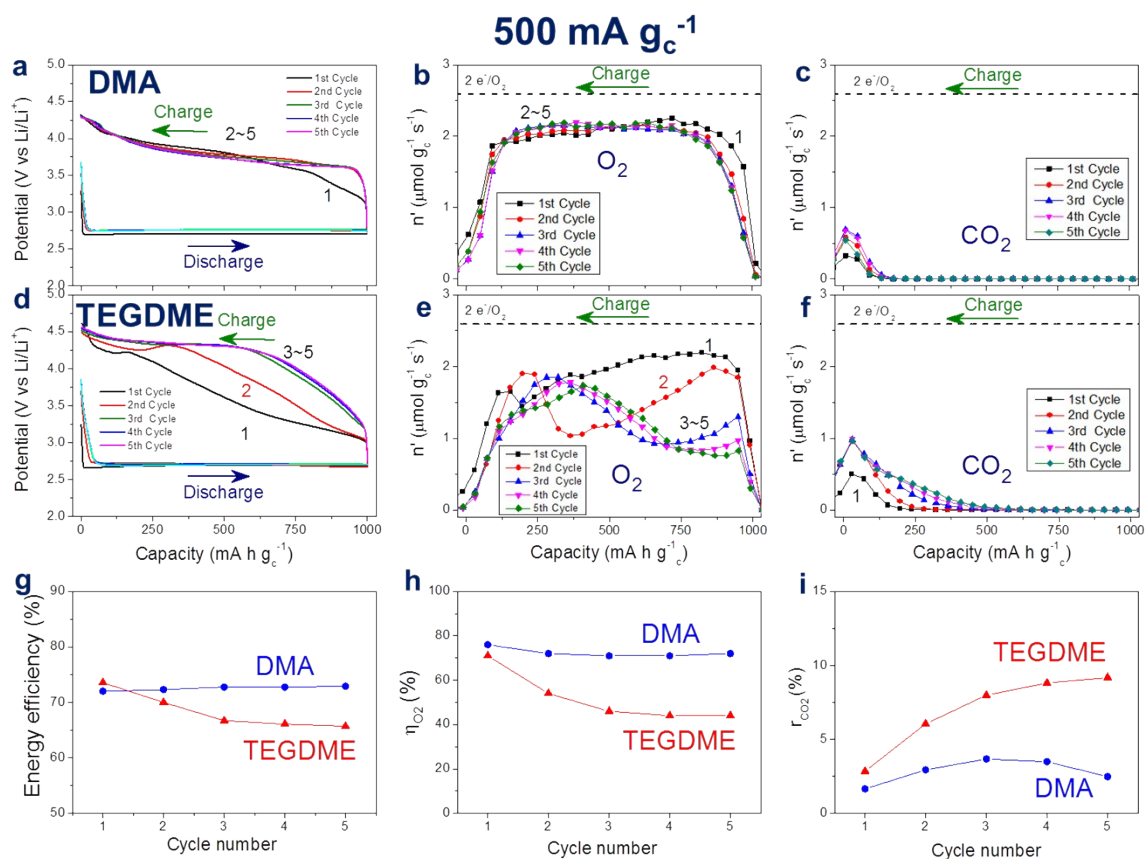

**Figure S1.** Potential profiles (a, d), the rates of O<sub>2</sub> evolution at charge (b, e), and the rates of CO<sub>2</sub> evolution at charge (c, f) in Li-O<sub>2</sub> cells with DMA-LiNO<sub>3</sub> electrolyte (a, b, c) or TEGDME-LiTFSI electrolyte (d, e, f) during the five cycles at current density of 500 mA g<sub>c</sub><sup>-1</sup>. Energy efficiency (g), oxygen efficiency at charge (h), and r<sub>CO<sub>2</sub></sub> (i) as a function of cycle number in Li-O<sub>2</sub> cells with DMA electrolyte or TEGDME electrolyte over the five cycles at current density of 500 mA g<sub>c</sub><sup>-1</sup>.

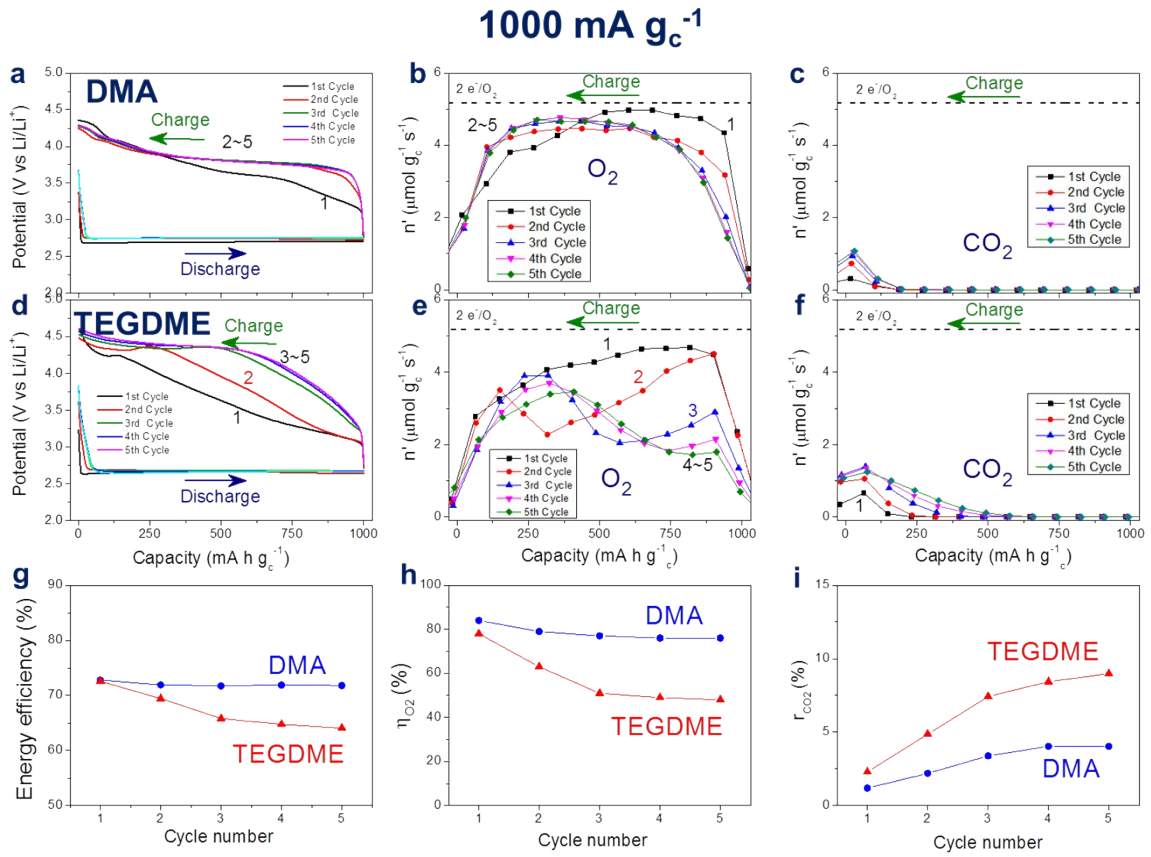

**Figure S2.** Potential profiles (a, d), the rates of O<sub>2</sub> evolution at charge (b, e), and the rates of CO<sub>2</sub> evolution at charge (c, f) in Li-O<sub>2</sub> cells with DMA-LiNO<sub>3</sub> electrolyte (a, b, c) or TEGDME-LiTFSI electrolyte (d, e, f) over the five cycles at current density of 1000 mA g<sub>c</sub><sup>-1</sup>. Energy efficiency (g), oxygen efficiency at charge (h), and r<sub>CO<sub>2</sub></sub> (i) as a function of cycle number in Li-O<sub>2</sub> cells with DMA electrolyte or TEGDME electrolyte over five cycles at current density of 1000 mA g<sub>c</sub><sup>-1</sup>.

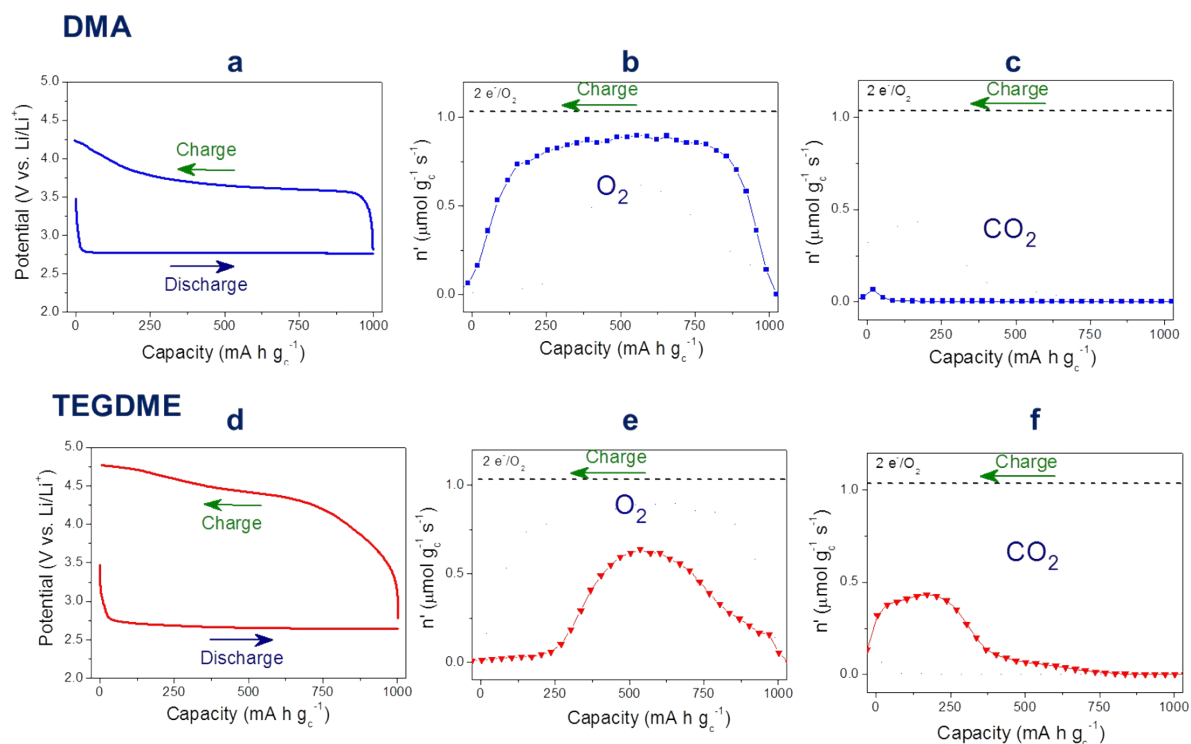

**Figure S3.** Potential profiles (a, d), the rates of O<sub>2</sub> evolution at charge (b, e), and the rates of CO<sub>2</sub> evolution at charge (c, f) in Li-O<sub>2</sub> cells with DMA-LiNO<sub>3</sub> electrolyte (a, b, c) or TEGDME-LiTFSI electrolyte (d, e, f) at the 10<sup>th</sup> cycle with current density of 200 mA g<sub>c</sub><sup>-1</sup>.

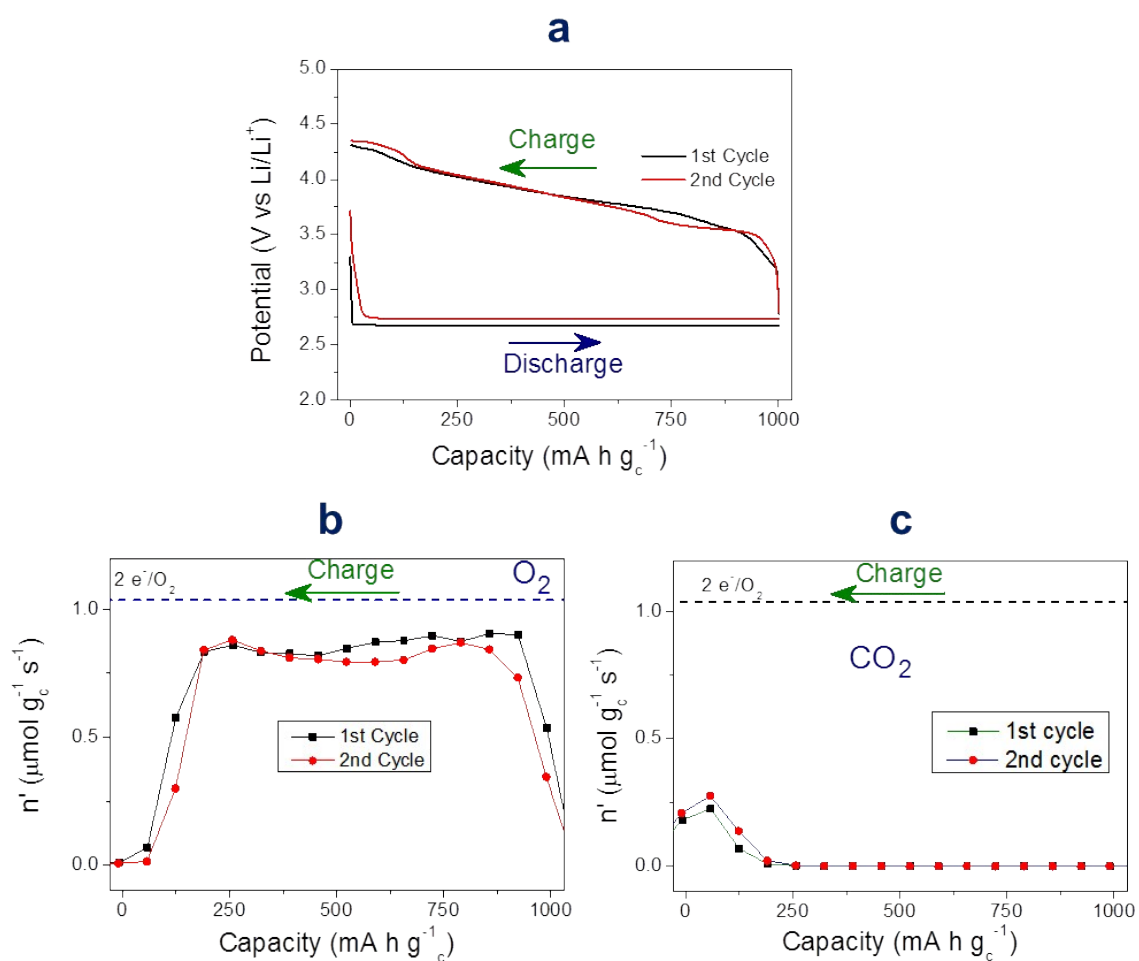

**Figure S4.** Potential profiles (a), the rates of O<sub>2</sub> evolution at charge (b), and the rates of CO<sub>2</sub> evolution at charge (c) in Li-O<sub>2</sub> cells with TEGDME with 0.5 M LiNO<sub>3</sub> during the first two cycles. The current density is 200 mA g<sub>c</sub><sup>-1</sup>.
